# Supplementary material
Source: Springer Nature journal article supplement (https://www.springermedizin.de/resource/supplementary/12884_2009_308_MOESM2_ESM.pdf/9457426)

**(a) Estimated mortality in 4-component model**

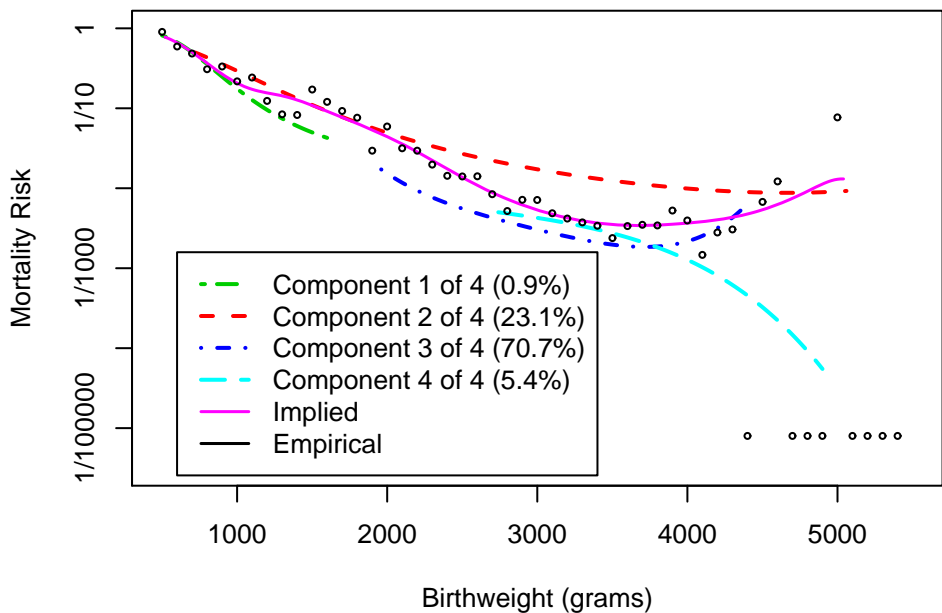

**(b) Estimated mortality in contaminated model**

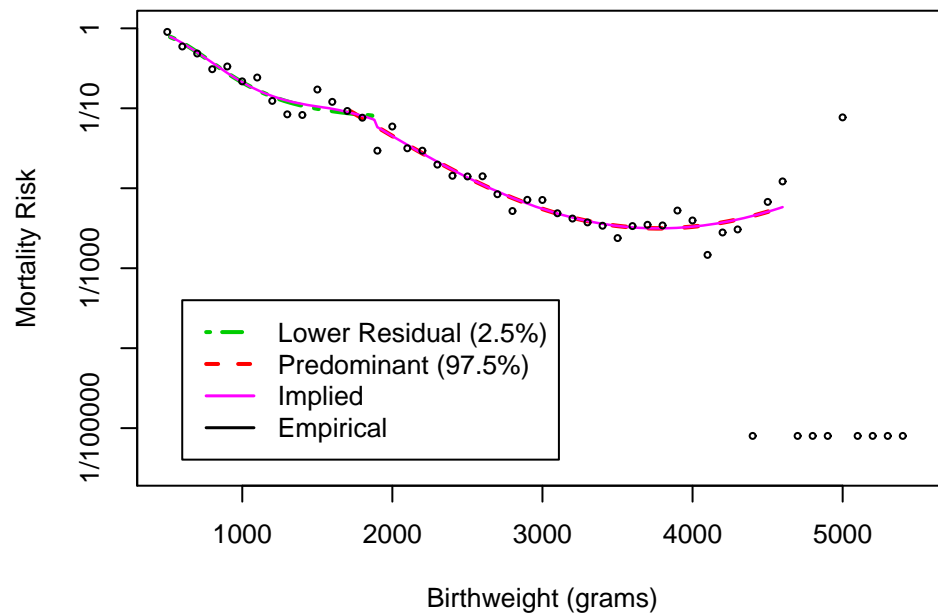

**(c) Estimated mortality in 2-component model**

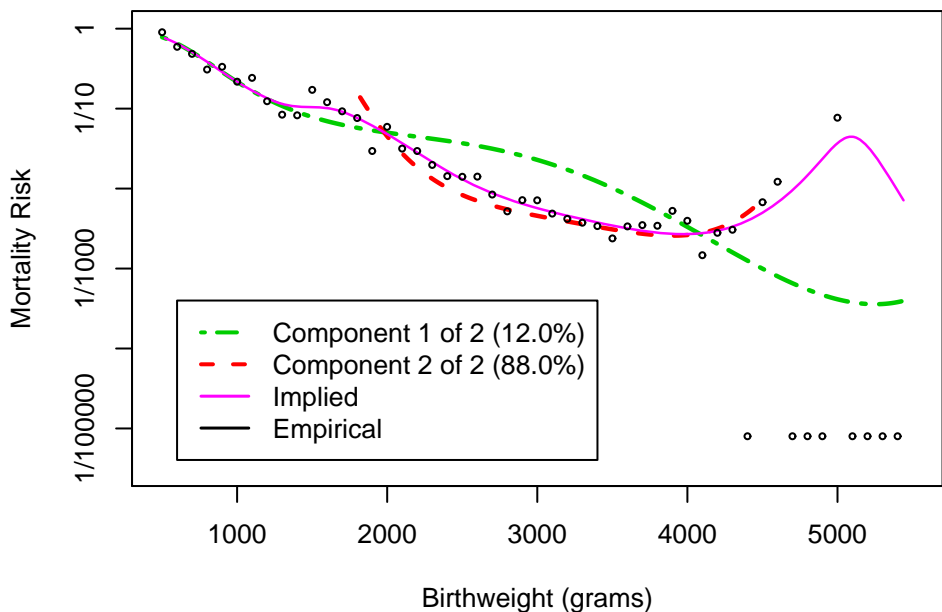

**(d) Confidence bounds for mortality in 4-component model**

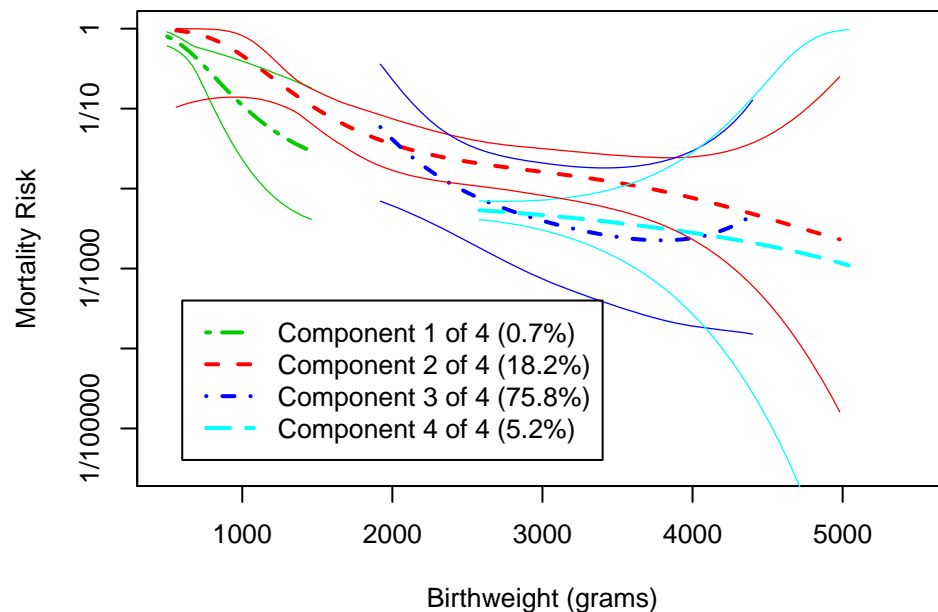

Supplement: MOESM2 [file 9457426]
